# Supplementary material
Source: JCI journal article supplement (doi:10.1172/jci.insight.200202)
Supplement: sd2 [file 2]

## Supplementary Figure 1

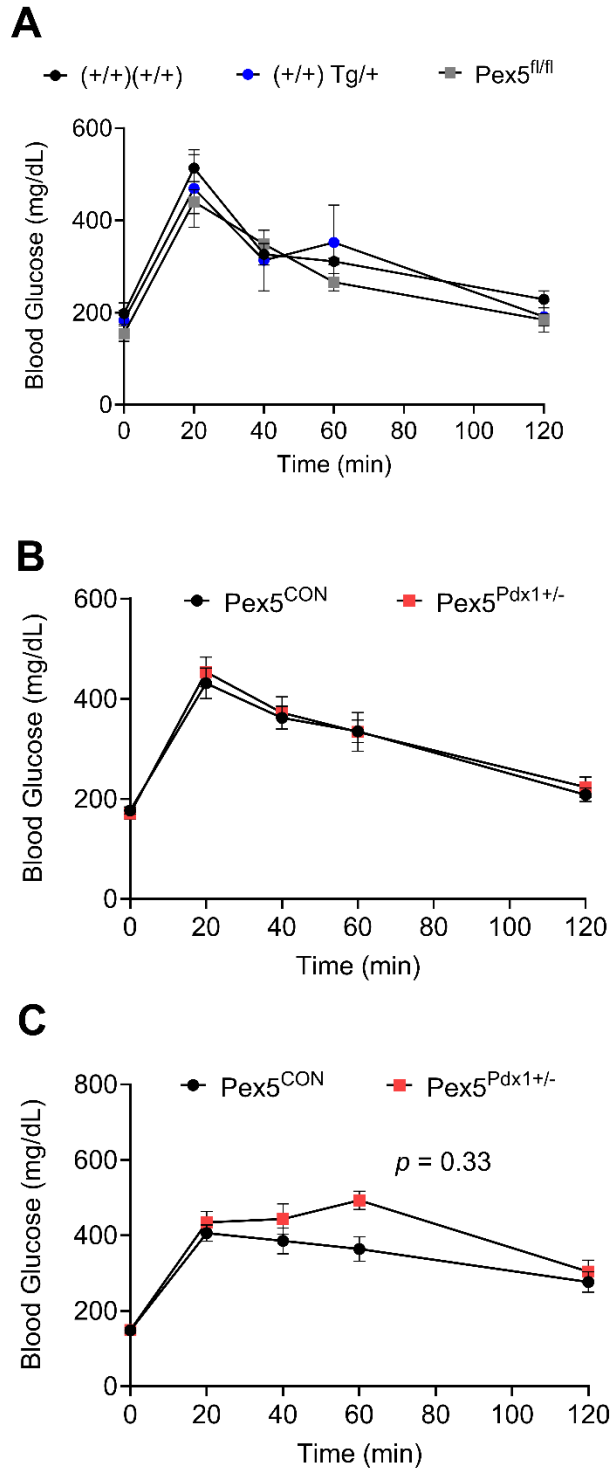

**Heterozygous loss of peroxisomal function in the pancreas does not impact glucose tolerance. (A)** Intraperitoneal glucose tolerance tests (ipGTTs) and corresponding area under the curve (AUC) calculations in 8 week old male littermate control groups including: C57BL6/J, also referred to here as (+/+) (+/+) , Pdx1-cre mice, referred to here as (+/+) Tg/+ , and Pex5<sup>fl/fl</sup> mice; n=5. **(B)** ipGTT in 12 old Pex5<sup>CON</sup> and heterozygous Pex5<sup>Pdx1 +/-</sup> mice; n=10-20. **(C)** ipGTT in 20 old male Pex5<sup>CON</sup> and heterozygous Pex5<sup>Pdx1 +/-</sup> mice; n=10-20. Data are shown as mean  $\pm$  SEM.  $p$  values shown on graph represent area under the curve (AUC) calculations versus control.

## Supplementary Figure 2

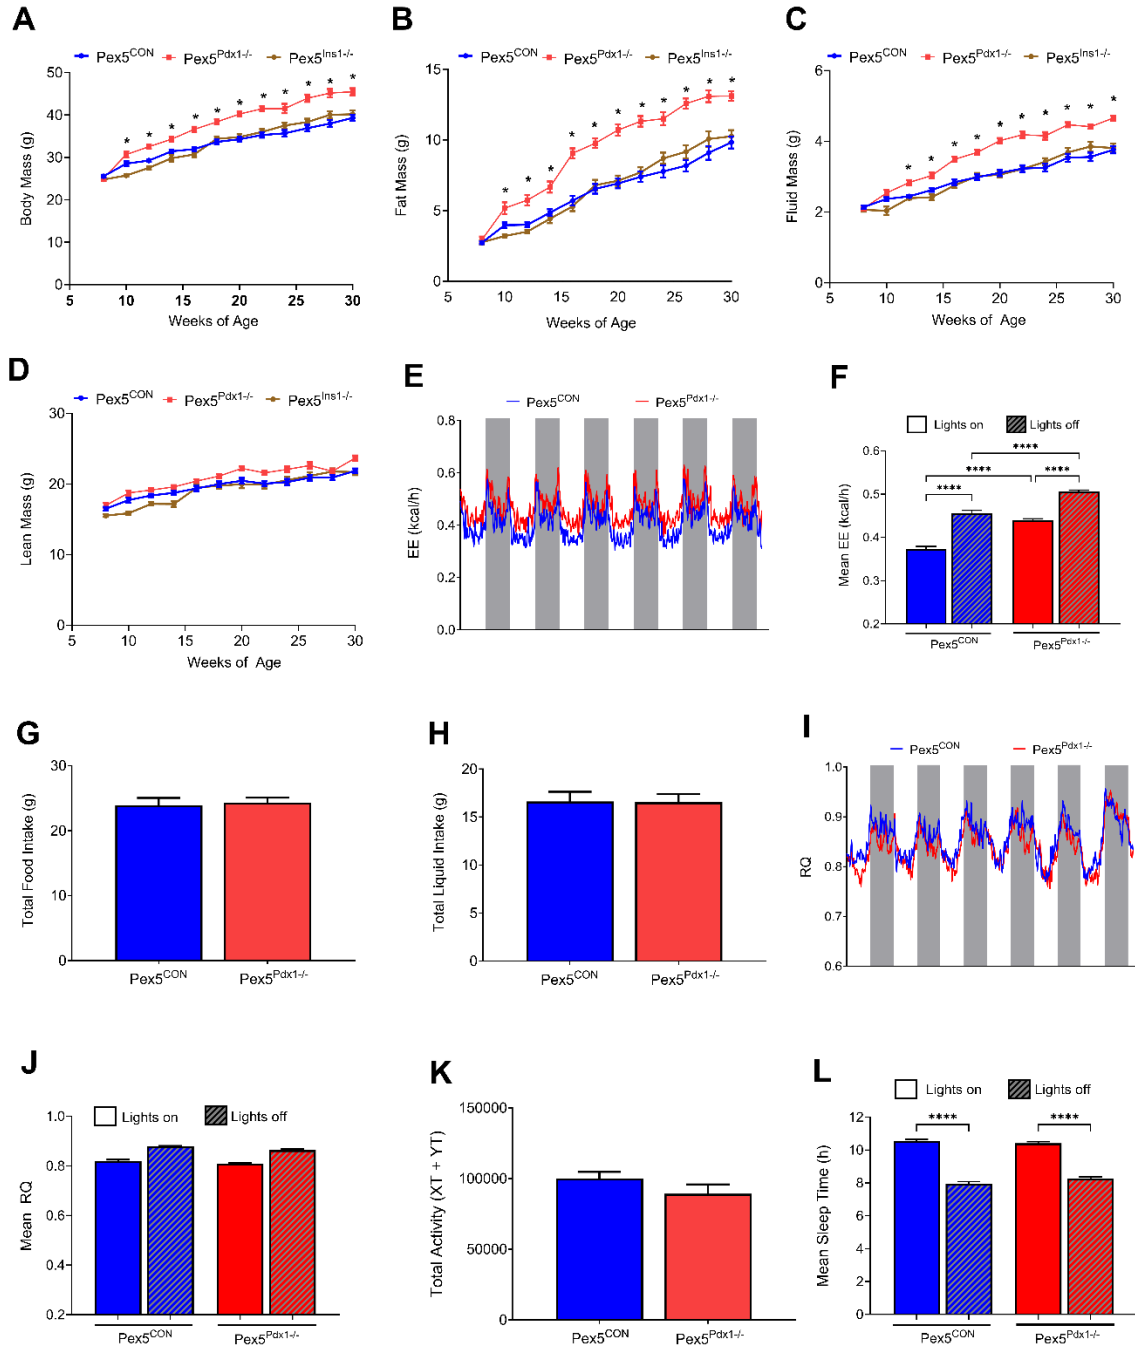

**Loss of peroxisomal function in the pancreas of male mice promotes increased body mass, energy expenditure, with no change in respiratory quotient or activity. (A-D)** Body mass, fat mass, fluid mass, and lean mass, respectively, in male  $Pex5^{CON}$ ,  $Pex5^{Pdx1^{-/-}}$ , and  $Pex5^{Ins1^{-/-}}$  mice from 8 to 30 weeks of age;  $n = 25-30$ . **(E)** Energy expenditure (EE) across the light (*white bars*) and dark (*gray bars*) cycle over a 7 day period, **(F)** mean EE separated by light on and off cycles for a 7 day period, **(G)** total food intake, **(H)** total liquid intake for a 7 day period, **(I)** respiratory quotient (RQ) across the light (*white bars*) and dark (*gray bars*) cycle over a 7 day period, **(J)** mean RQ calculated by light on and off cycles for a 7 day period, **(K)** total activity measured by X and Y beam breaks, and **(L)** mean sleep time calculated by light on and off cycles for a 7 day period, in 22 week old male  $Pex5^{CON}$  and  $Pex5^{Pdx1^{-/-}}$  mice;  $n = 8$ . Data are shown as mean  $\pm$  SEM. \* $P < 0.05$ , \*\*\*\* $P < 0.0001$ . Multiple unpaired *t* tests (**A-D**), one-way ANOVA with multiple comparisons (**F, J, L**), or 2-tailed Student's *t* test (**G, H, K**).

### Supplementary Figure 3

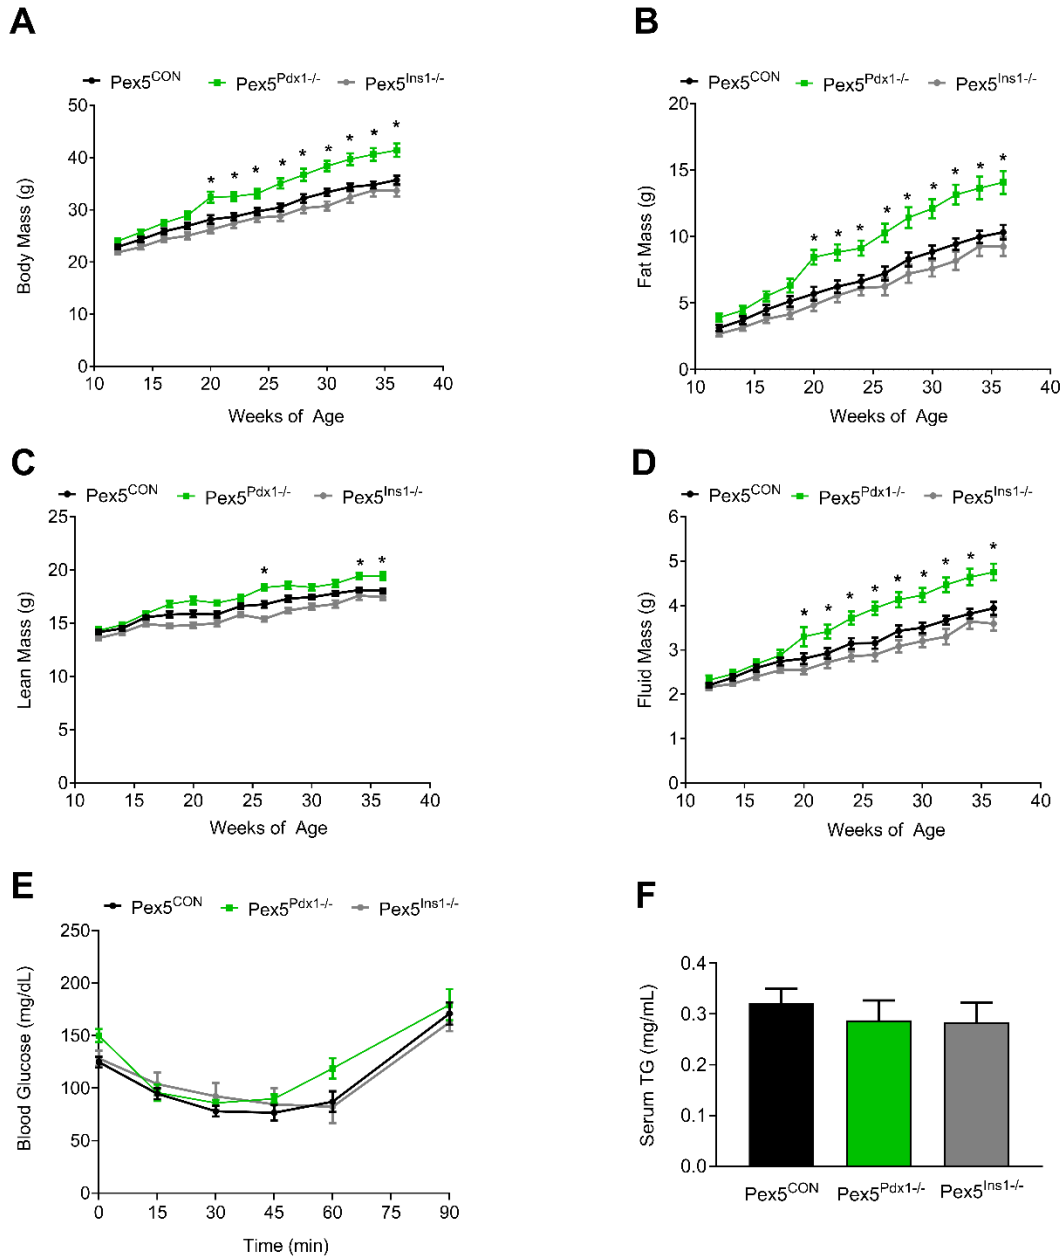

**Loss of peroxisomal function in the pancreas and  $\beta$  cells of female mice doesn't alter peripheral insulin sensitivity. (A-D)** Body mass, fat mass, lean mass, and fluid mass, respectively, in female Pex5<sup>CON</sup>, Pex5<sup>Pdx1<sup>-/-</sup></sup>, and Pex5<sup>Ins1<sup>-/-</sup></sup> mice from 12 to 36 weeks of age;  $n = 11-19$ . **(E)** Insulin tolerance test (ITT), and **(F)** serum TGs in 30 week old female Pex5<sup>CON</sup>, Pex5<sup>Pdx1<sup>-/-</sup></sup>, and Pex5<sup>Ins1<sup>-/-</sup></sup> mice;  $n = 9-20$ . Data are shown as mean  $\pm$  SEM.  $*P < 0.05$ . Multiple unpaired  $t$  tests **(A-D)**, or one-way ANOVA with multiple comparisons **(F)**.

## Supplementary Figure 4

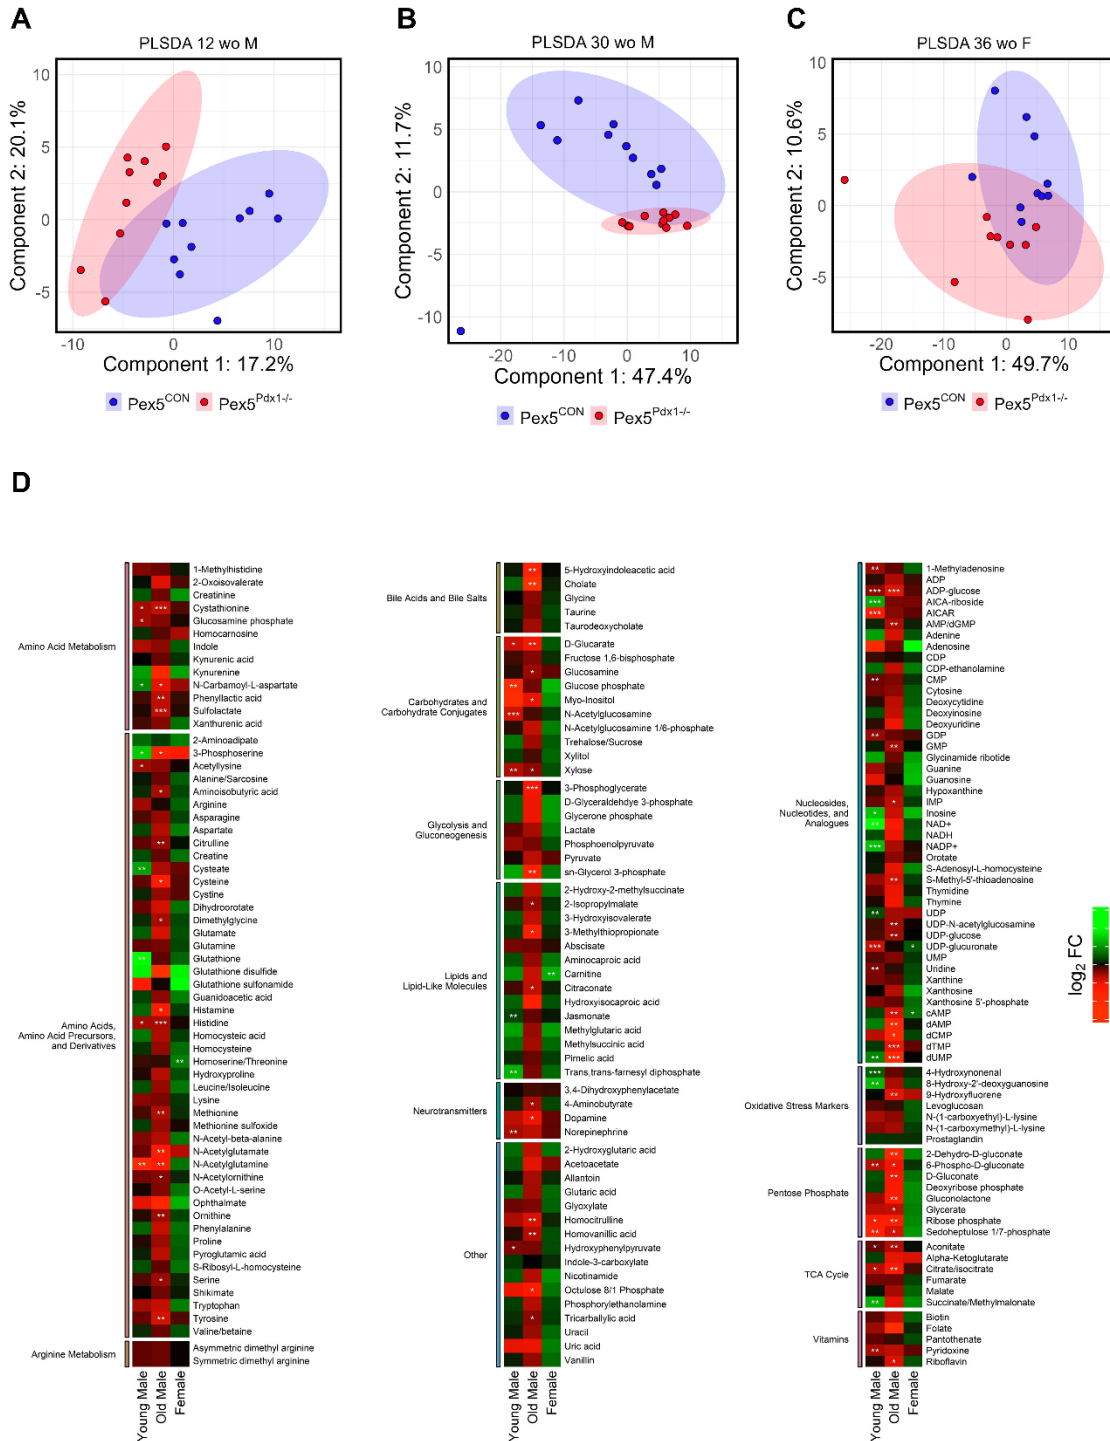

**Coordinated alterations in metabolite signature in pancreas from Pex5<sup>Pdx1-/-</sup> mice. (A-C) PLS-DA scores plot, and (D) Heatmap for identified metabolites (data represented as Pex5<sup>Pdx1-/-</sup>/Pex5<sup>CON</sup>) in pancreatic tissue from 12 wo (young male) and 30 wo (older male) males, and 36 wo female Pex5<sup>CON</sup> and Pex5<sup>Pdx1-/-</sup> mice;  $n = 9-11$ .**
